# Supplementary material
Source: PubMed Central journal article supplement (PMC7035171)

Unedited gels for Figure 3

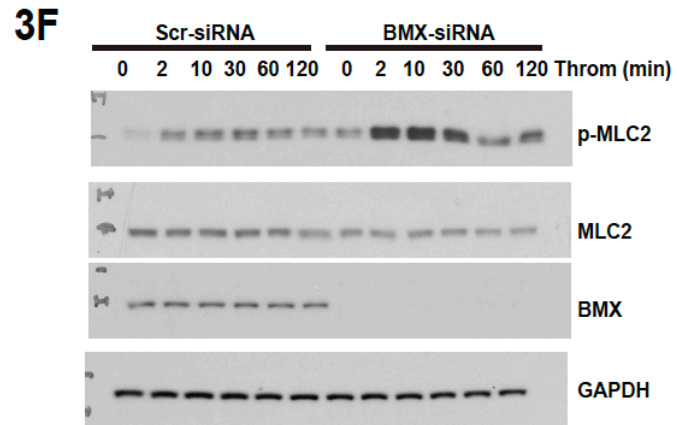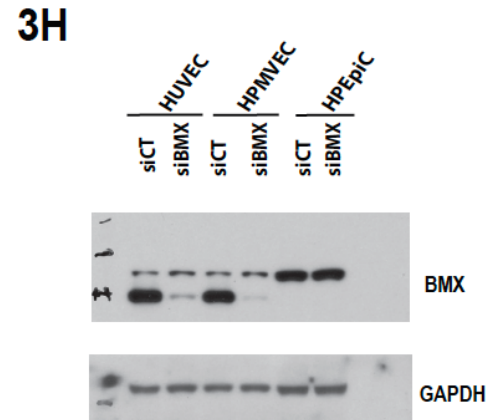

Unedited gels for Figure 4

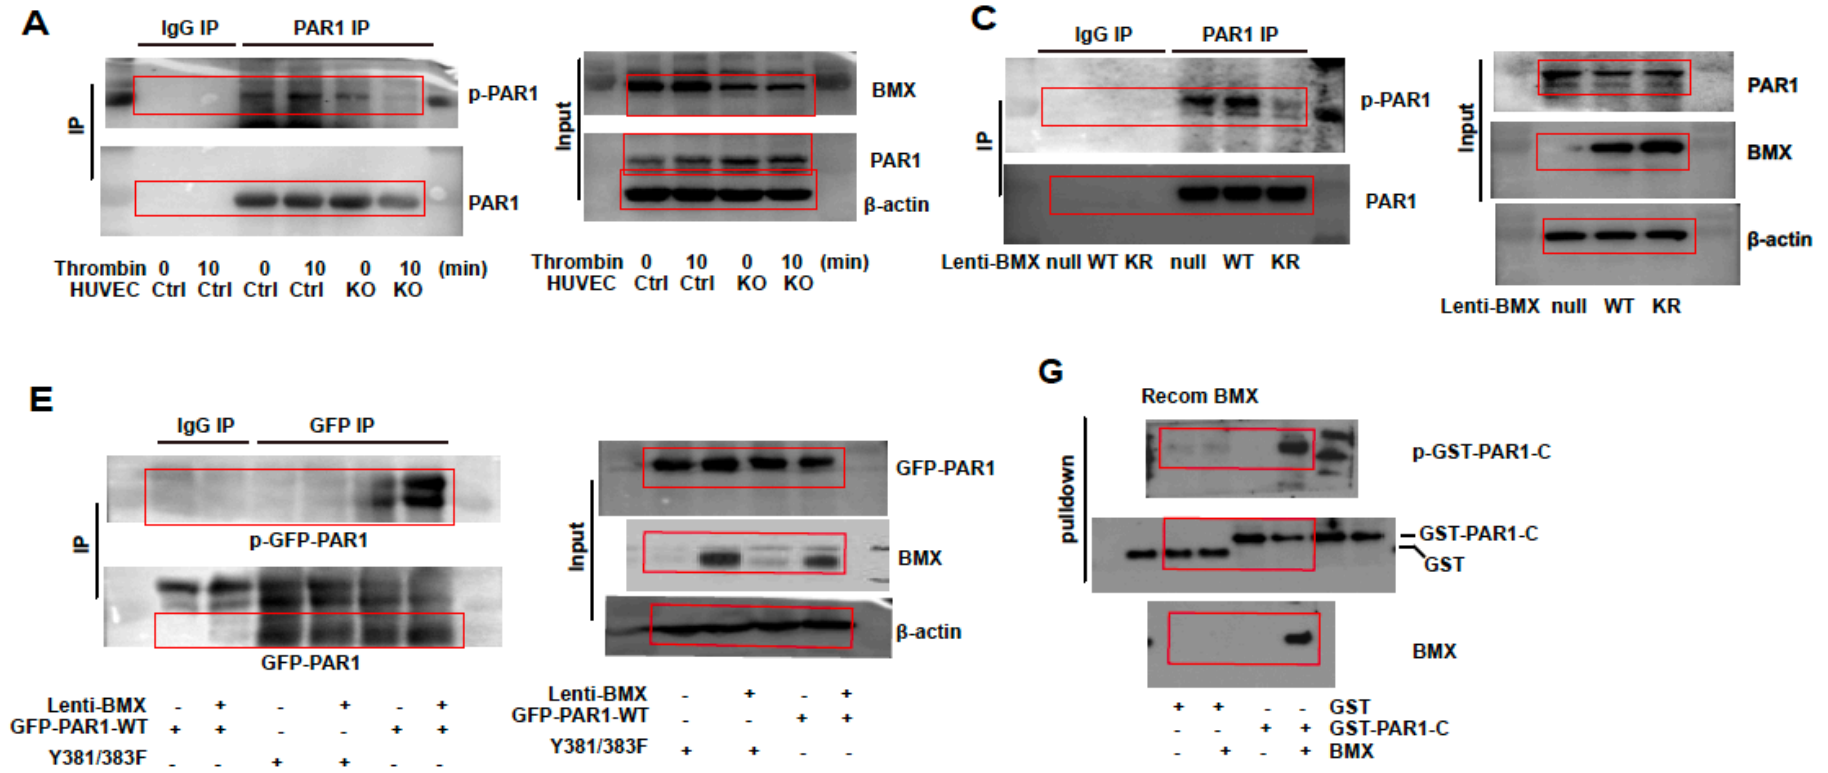

Unedited gels for Figure 4

4H

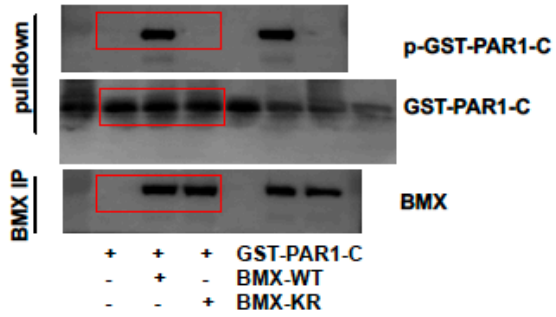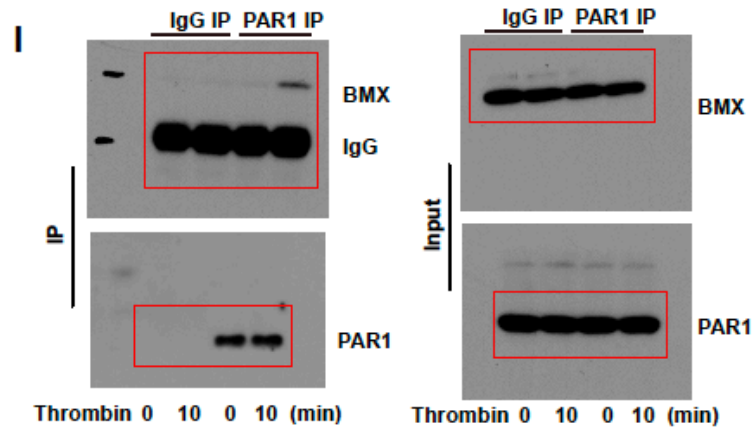

J

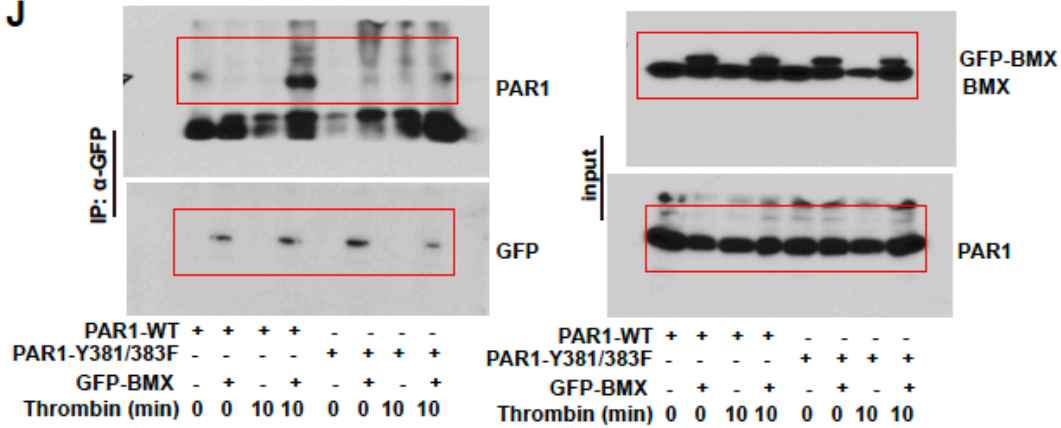

Unedited gels for Figure 5

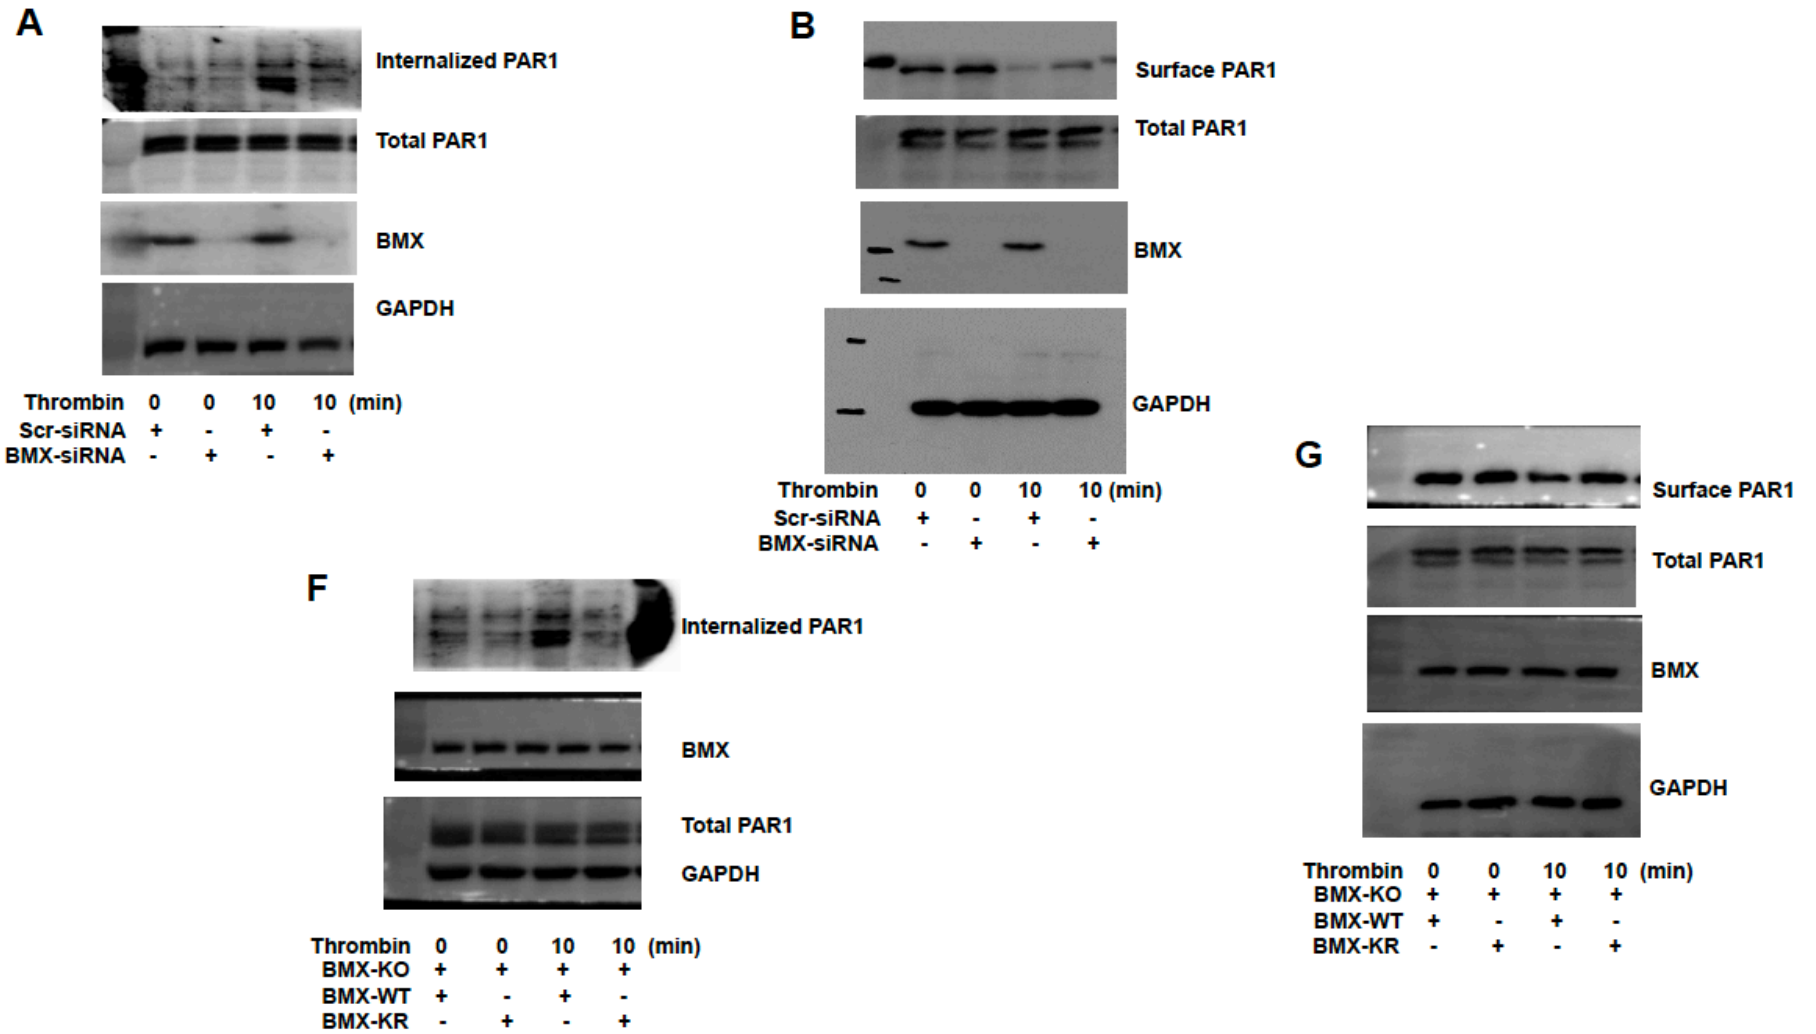

Unedited gels for Online Figure 3

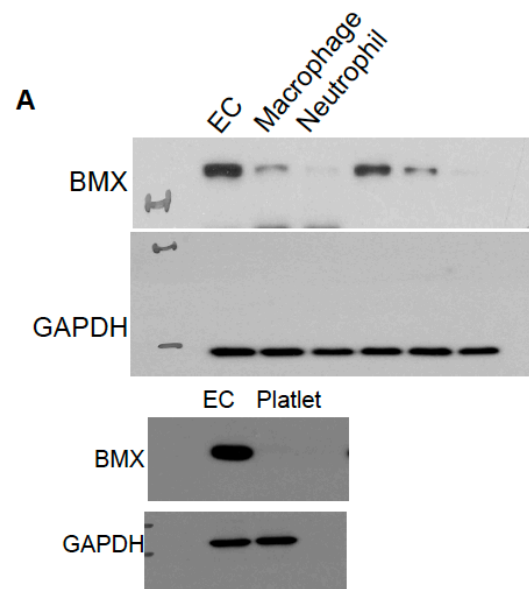

Unedited gels for Online Figure 5

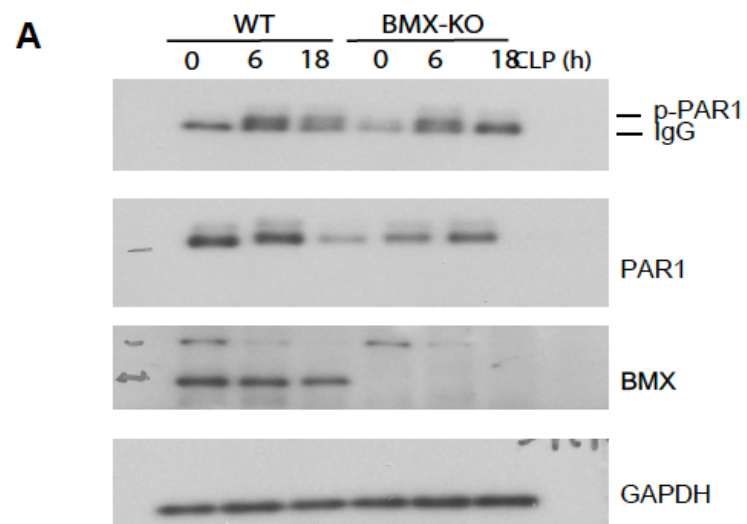

Unedited gels for Online Figure 6

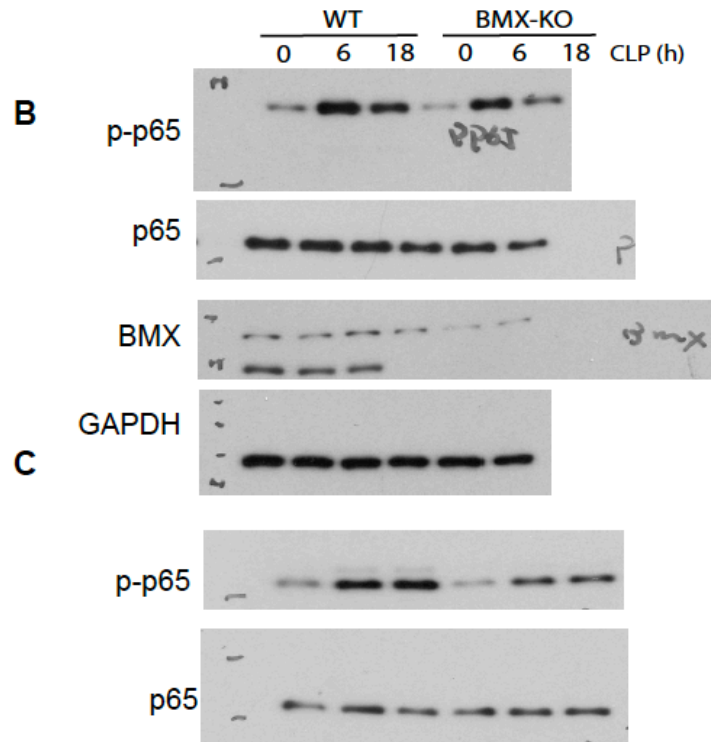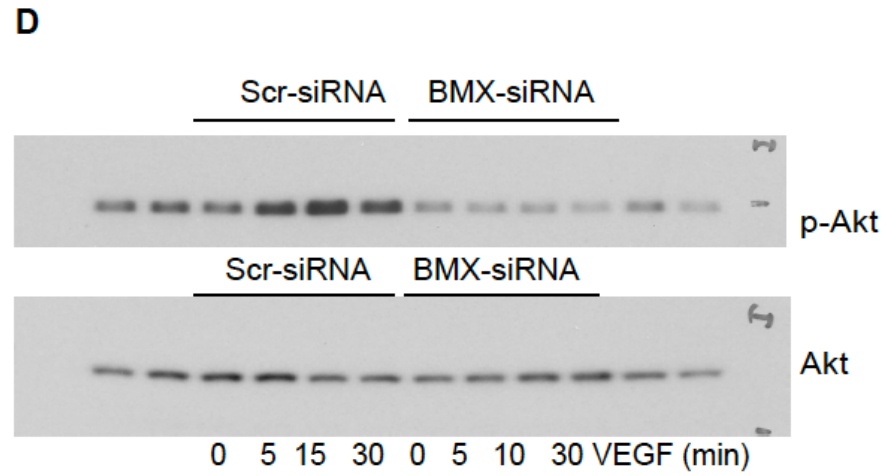

Unedited gels for Online Figure 7

**A**

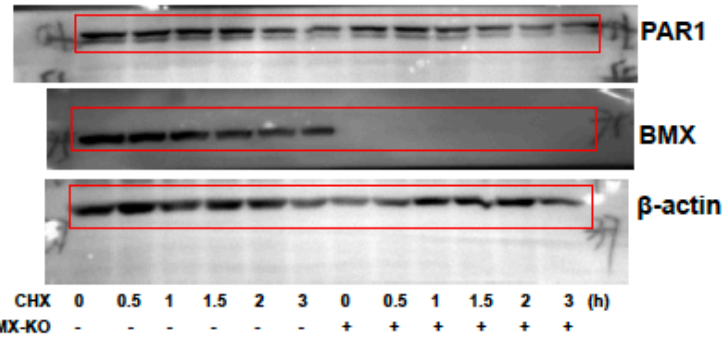

**C**

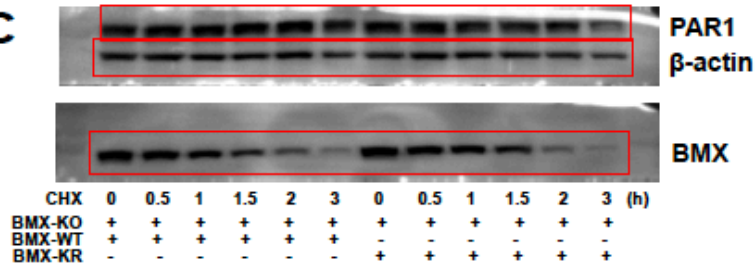

**E**

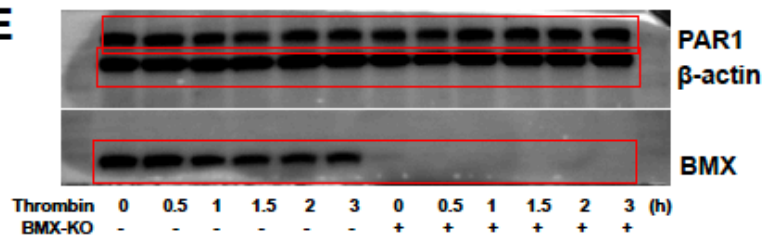

Supplement: NIHMS1549166-supplement-315769_Ucut_Gel_Blots.pdf [file NIHMS1549166-supplement-315769_Ucut_Gel_Blots.pdf]
